# Supplementary material
Source: publisher site journal article supplement (https://www.spandidos-publications.com/5437/downloadSupplementary)

Figure S1. The total ion chromatograms of the TB by UPLC-Q/TOF-MS/MS in negative-ion modes.

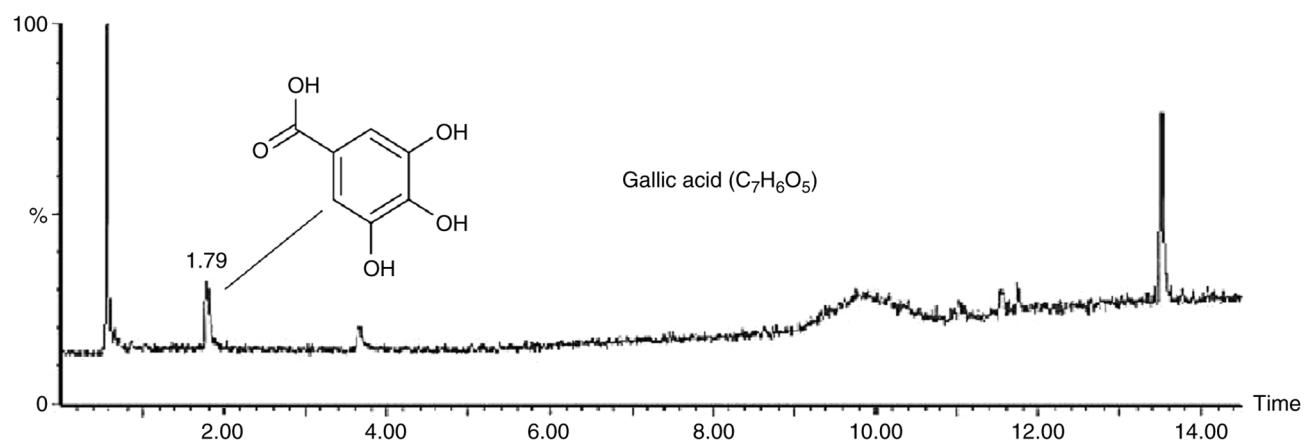

Supplement: Supplementary file 1 [file downloadSupplementary]
